# Supplementary material
Source: PubMed Central journal article supplement (PMC4474529)
Supplement: embj0034-1538-sd1.pdf [file embj0034-1538-sd1.pdf]

**A**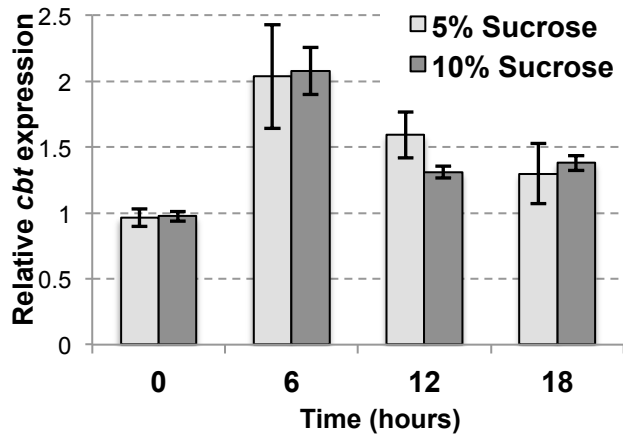**B**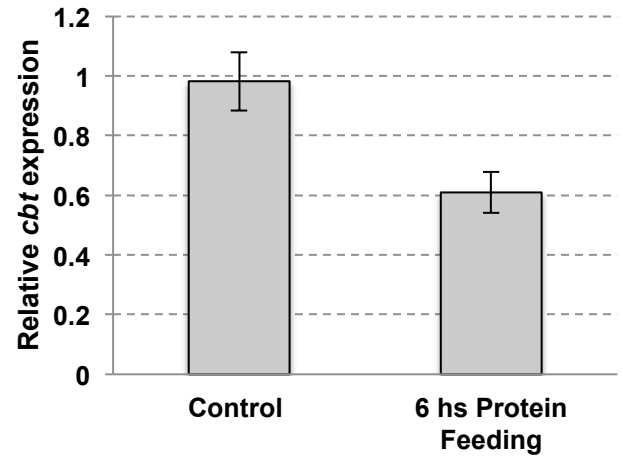**Supplementary Figure S1**

**A**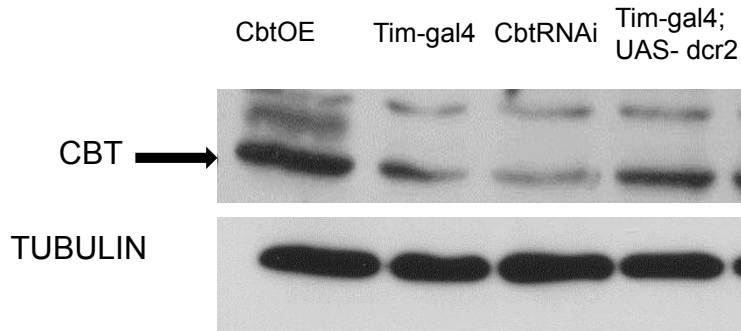**B****GO terms for genes affected by *cbt* manipulations**

|                                                                 | n  | P-value Benjamini |
|-----------------------------------------------------------------|----|-------------------|
| <b>Neuron related</b>                                           |    |                   |
| GO:0007186~G-protein coupled receptor protein signaling pathway | 27 | 5.78484E-05       |
| GO:0050877~neurological system process                          | 41 | 0.000173914       |
| GO:0044456~synapse part                                         | 15 | 0.000615765       |
| GO:0034702~ion channel complex                                  | 10 | 0.001842771       |
| GO:0045211~postsynaptic membrane                                | 7  | 0.048178794       |
| <b>Immunity/Defense</b>                                         |    |                   |
| GO:0006952~defense response                                     | 34 | 9.15387E-09       |
| GO:0006508~proteolysis                                          | 64 | 1.63682E-06       |
| GO:0006955~immune response                                      | 28 | 7.17351E-06       |
| GO:0045087~innate immune response                               | 20 | 1.88199E-05       |
| GO:0042742~defense response to bacterium                        | 16 | 6.95632E-05       |
| <b>Metabolism</b>                                               |    |                   |
| IPR002347:Glucose/ribitol dehydrogenase                         | 14 | 0.000766031       |
| IPR002198:Short-chain dehydrogenase/reductase SDR               | 15 | 0.003060306       |
| IPR016040:NAD(P)-binding domain                                 | 22 | 0.005736804       |
| dme00620:Pyruvate metabolism                                    | 8  | 0.018076595       |
| dme00500:Starch and sucrose metabolism                          | 11 | 0.009258811       |
| dme00903:Limonene and pinene degradation                        | 12 | 0.035820426       |
| dme00040:Penrose and glucuronate interconversions               | 8  | 0.036450739       |
| dme00053:Ascorbate and aldarate metabolism                      | 7  | 0.046835714       |

**Supplementary Figure S2**

GLYCOLYSIS / GLUCONEOGENESIS

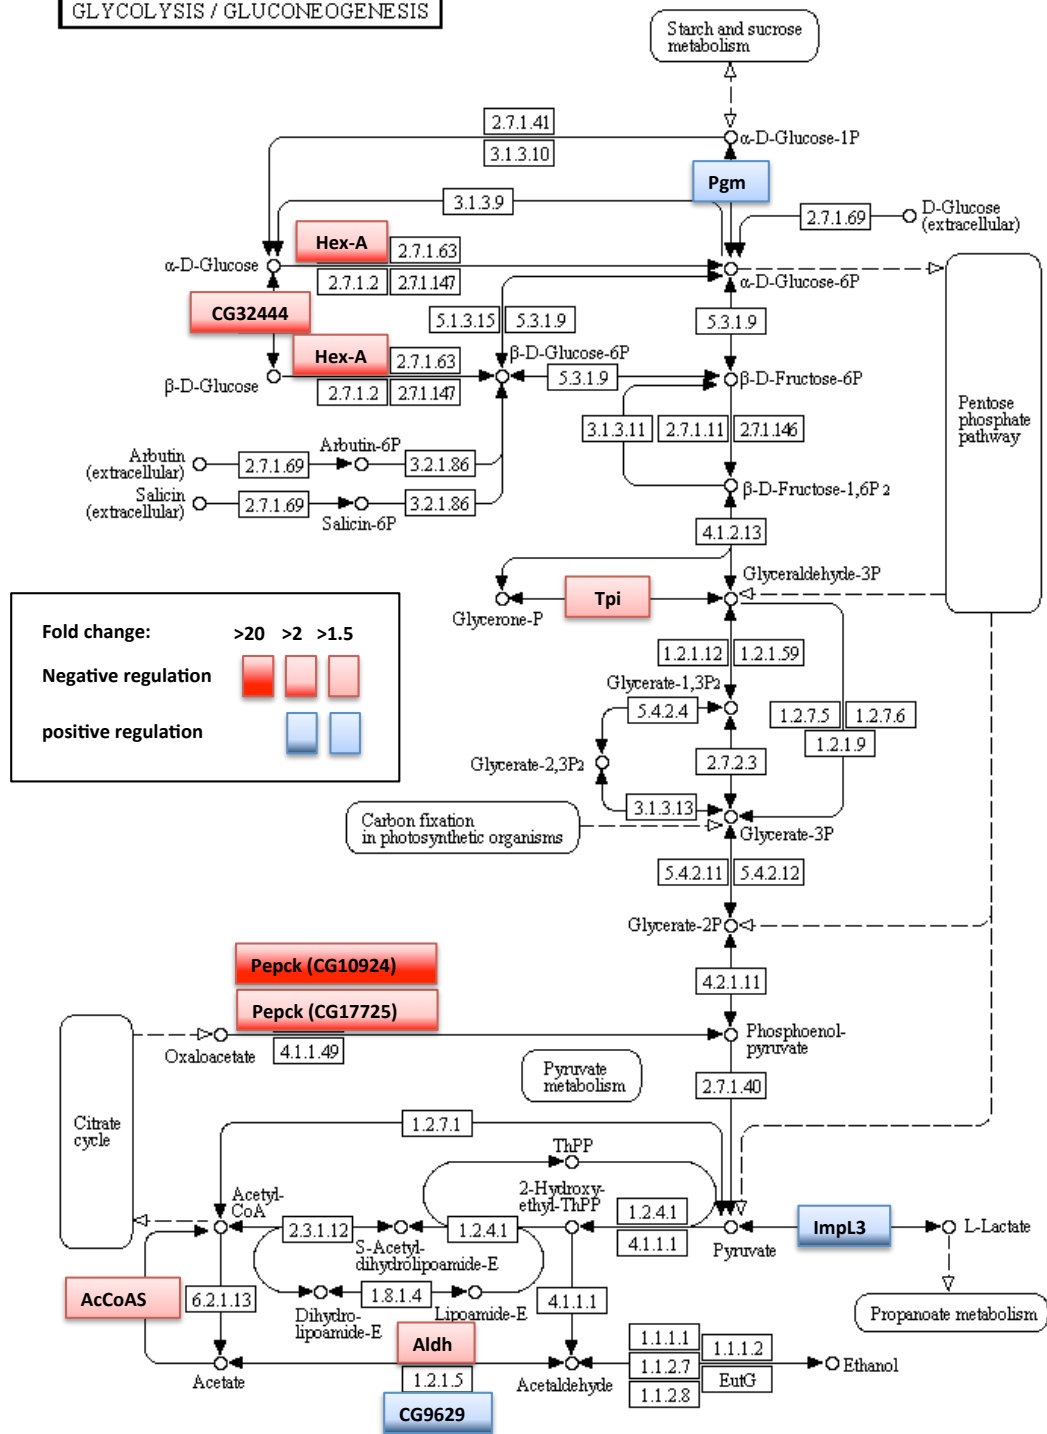

Supplementary Figure S3

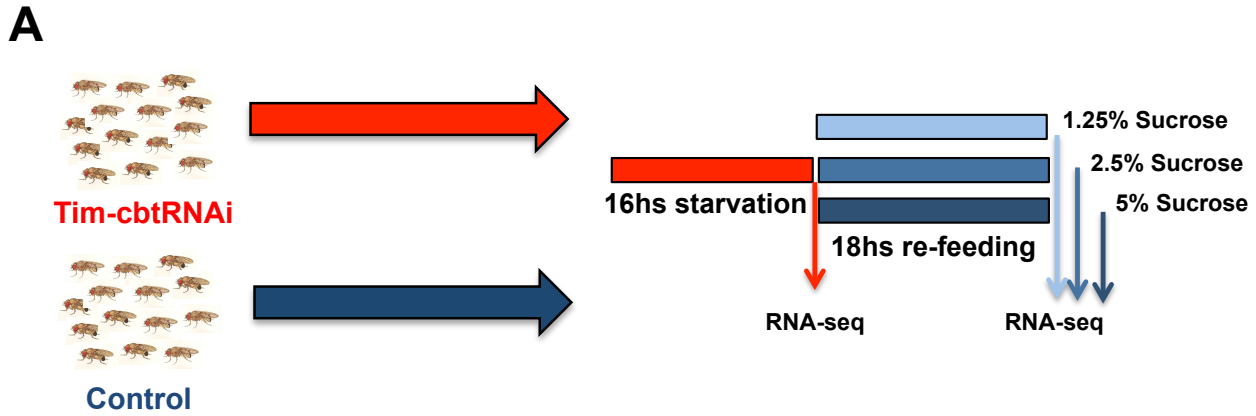

**B**

| Gene Name | Median Fold Change in Control | Median Fold Change in CbtRNAi |
|-----------|-------------------------------|-------------------------------|
| Pepck     | 0.2                           | 0.71                          |
| bmm       | 0.28                          | 0.45                          |
| CG32850   | 0.31                          | 1.99                          |
| CG8654    | 0.35                          | 1.02                          |
| smi35A    | 0.36                          | 1.04                          |
| CG18265   | 0.36                          | 0.76                          |
| CG9992    | 0.37                          | 0.97                          |
| CG16908   | 0.39                          | 0.94                          |
| Pngl      | 0.41                          | 1.03                          |
| CG3036    | 0.45                          | 1                             |
| Gyk       | 0.46                          | 0.74                          |
| CG18094   | 0.46                          | 0.80                          |
| fbp       | 0.5                           | 1                             |
| ct        | 0.54                          | 0.93                          |
| ash2      | 0.57                          | 0.85                          |
| T3dh      | 0.57                          | 0.84                          |
| oxt       | 0.57                          | 0.97                          |
| Lpt       | 0.58                          | 1.5                           |
| lkb1      | 0.58                          | 1.97                          |
| CG9935    | 0.59                          | 1.41                          |
| Mad1      | 0.64                          | 0.94                          |
| Pk92B     | 0.67                          | 1.12                          |

**Supplementary Figure S4**

**A****Repressed upon re-feeding**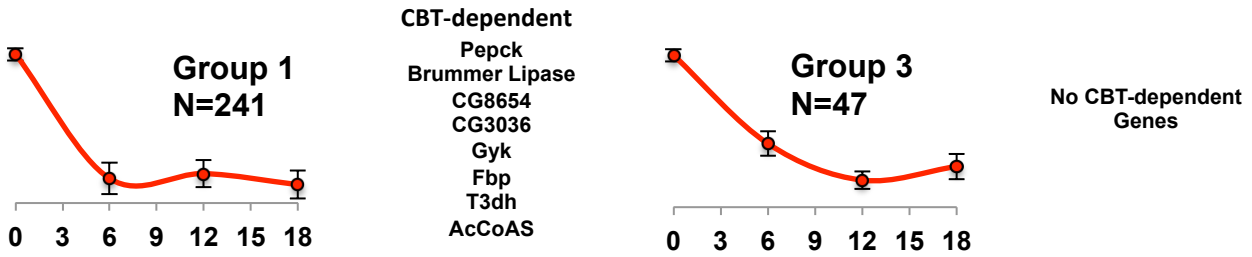**B****Increased upon re-feeding**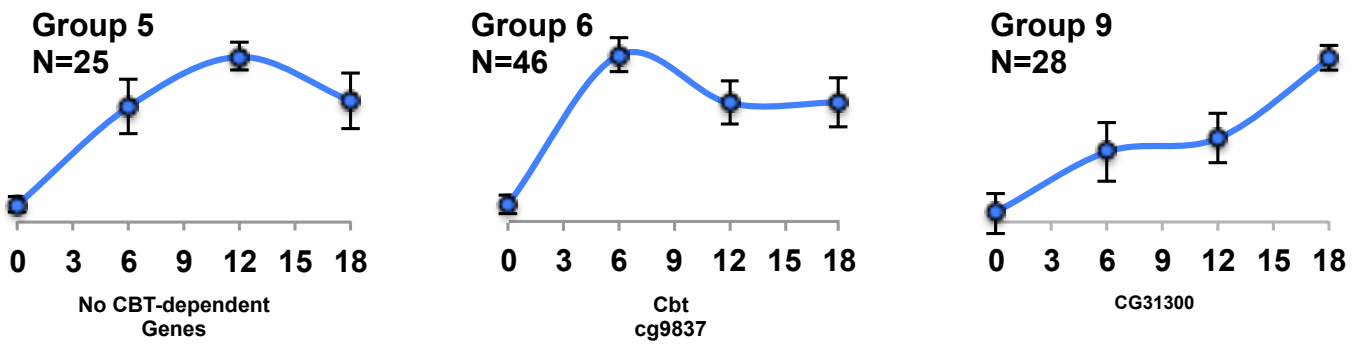**C****Slower response**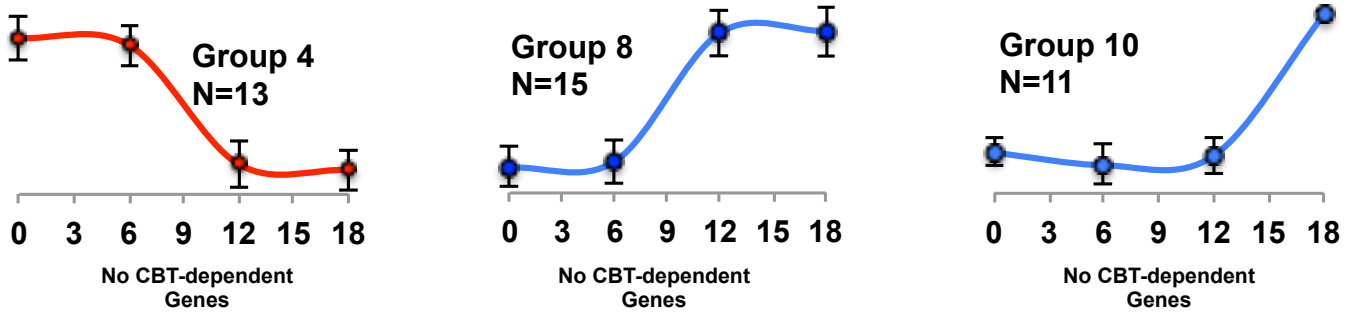**Supplementary Figure S5**

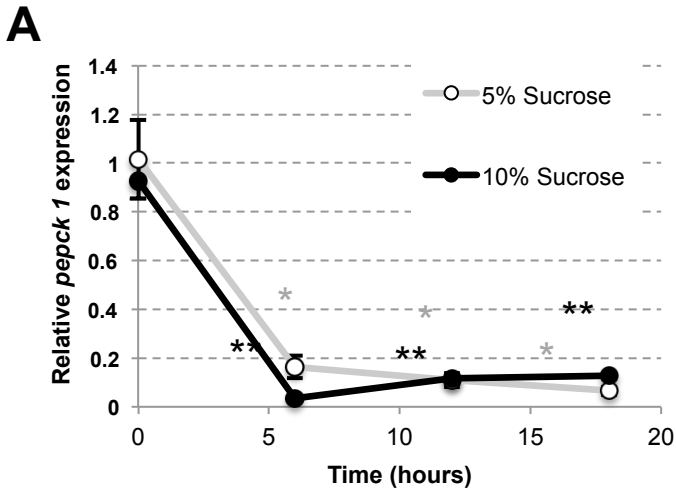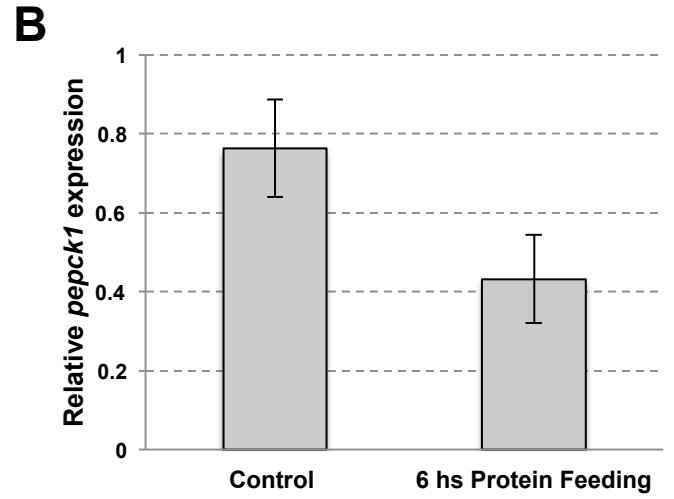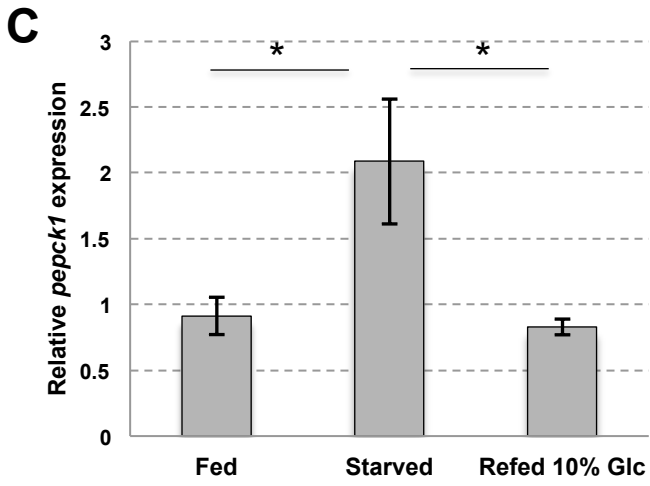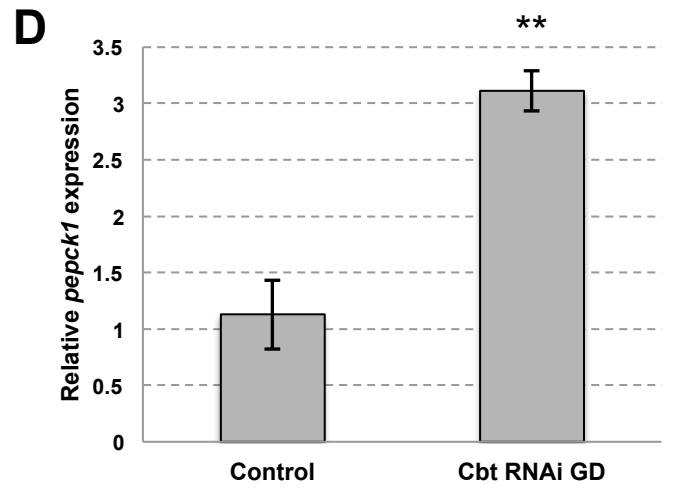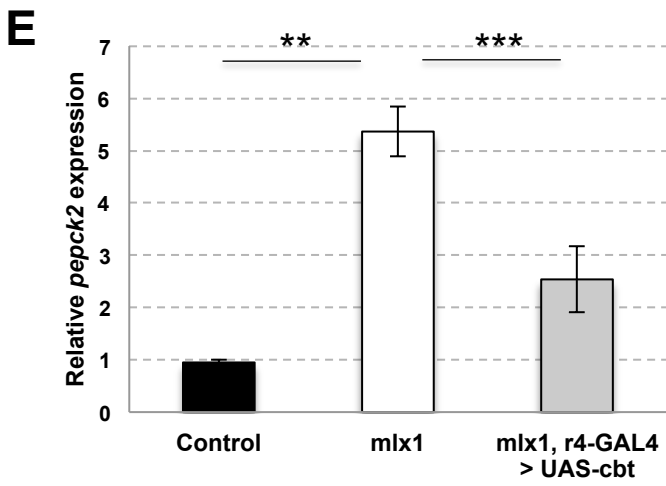

Supplementary Figure S6

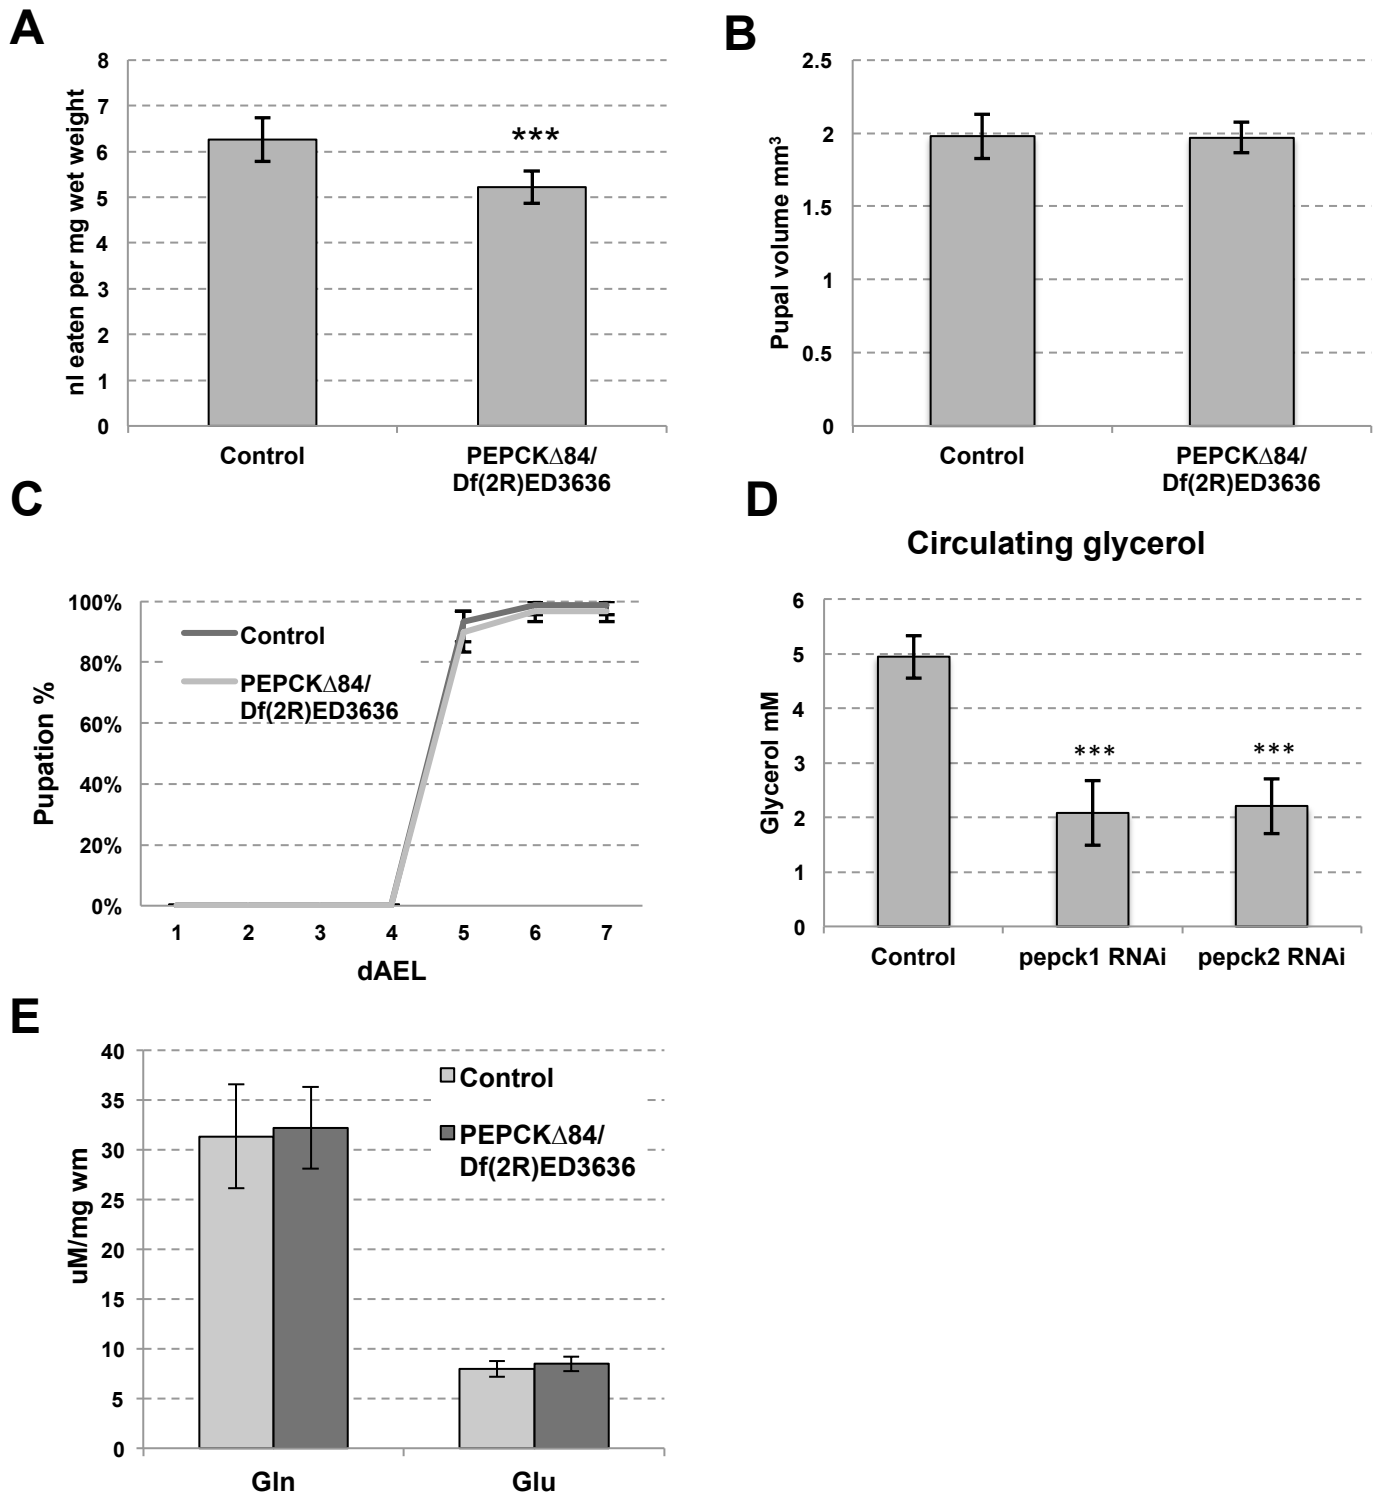

Supplementary Figure S7

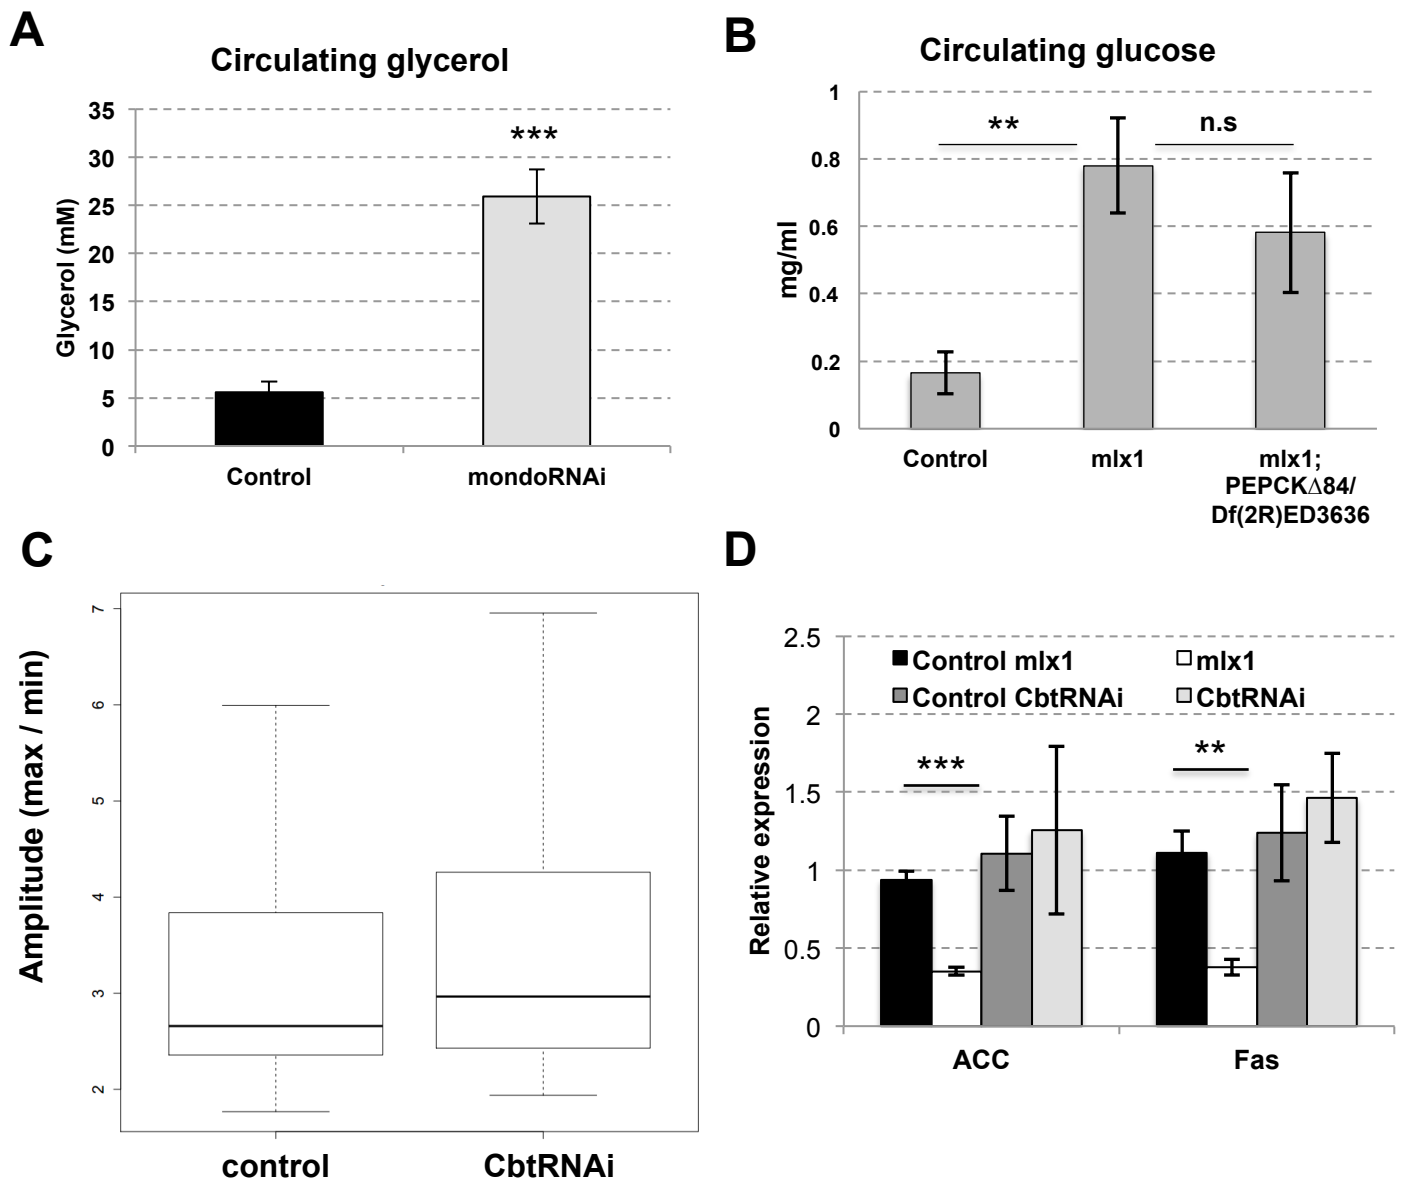

Supplementary Figure S8
